# Supplementary material
Source: PubMed Central journal article supplement (PMC2662145)

SUPPLEMENTARY DATA

Table 1: Primers sequences used for BAC homologous recombination

| Homology box |     | Primer Sequence                       | PCR product |
|--------------|-----|---------------------------------------|-------------|
| Tbp1 5'      | Fwd | 5' ACCCCCGGGCTCCTCGGAACTCTTCCTTC 3'   | 848 bp      |
|              | Rev | 5' GCCGATATCTTCCATCTGCTTTGTTCTCTTC 3' |             |
| Tbp1 3'      | Fwd | 5' TCGGAATTCCTACTGTTCATTGCCATCAC 3'   | 1170 bp     |
|              | Rev | 5' TCGGAATTCATGGCCAAGAGTAAATCCC 3'    |             |
| PU.1 5'      | Fwd | 5' GCTCCCGGGAGATGGATGGATATAGGCAG 3'   | 1305 bp     |
|              | Rev | 5' TAGCGTCGACCAGCTGAGCTCCAGGTTGG 3'   |             |
| PU.1 3'      | Fwd | 5' GCAGCCATGTTTCAGAGGTG 3'            | 703 bp      |
|              | Rev | 5' CCTTGTGCTTGGACGAGAACTG 3'          |             |

Figure 1: Rescue of CD4/CD8 thymocyte repartition in *gl/gl* PU.1-Ost $\mu$ 1 transgenic thymus compared to wild-type and *gl/gl* controls

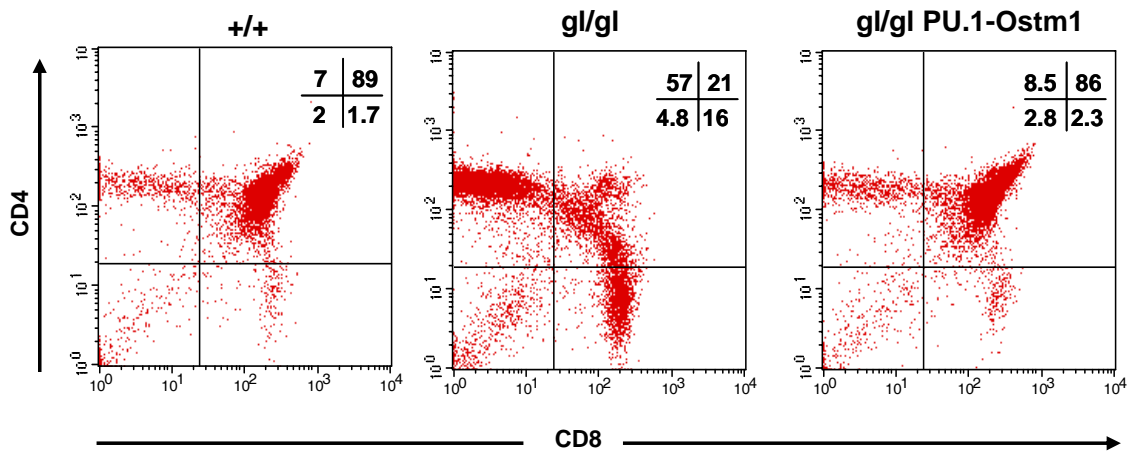

Supplement: M805242200_1.pdf [file M805242200_1.pdf]
